# Supplementary material for: A press-rotary triboelectric-electromagnetic hybrid energy harvesting device for indoor IoT node power supply and smart home control
Source: Royal Society of Chemistry journal article supplement (doi:10.1039/d3se00690e), 2023-01-01
Supplement: d3se00690e1.pdf [file d3se00690e1.pdf]

## 1 Supplementary Information

# 2 A press-rotary triboelectric-electromagnetic hybrid 3 energy harvesting device for indoor IoT node power 4 supply and smart home control

5 Xin Yu <sup>a</sup>, Jiqing Chen <sup>a</sup>, Zhibo Xu <sup>b</sup>, Xiaohui Lu <sup>c</sup>, Peinian Zhang <sup>a</sup>, Yi Zhang <sup>a</sup>,  
6 Jing Zhao <sup>a,\*</sup>, Changhong Jiang <sup>a,\*</sup>

7 <sup>a</sup> School of Electrical and Electronic Engineering, Changchun University of Technology, Changchun, Jilin 130012, China

8 <sup>b</sup> College of Physics, Jilin University, Changchun 130012, China

9 <sup>c</sup> School of Mechatronic Engineering, Changchun University of Technology, Changchun, Jilin 130012, China

10 \* Corresponding authors' e-mail addresses: zhaojing@ccut.edu.cn, yuxinnick@ccut.edu.cn

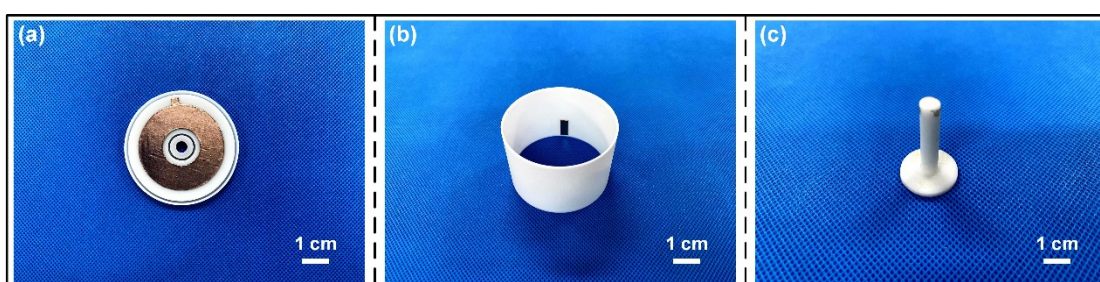

11  
12 **Fig. S1** Photos of components in PR-TEHD. (a) Top cover. (b) Shell. (c) Connecting shaft.

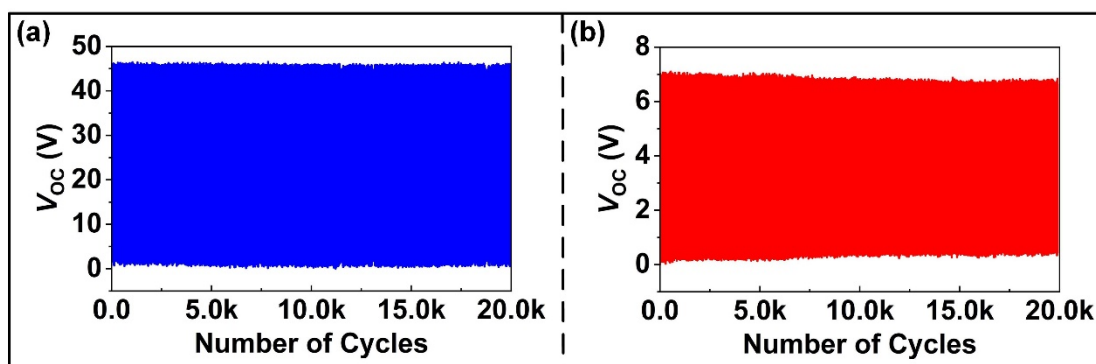

13  
14 **Fig. S2** Stability test of CS-TENG and FR-TENG. The open-circuit voltage ( $V_{OC}$ ) for (a) 20,000  
15 cycles of continuous operation for CS-TENG and (b) 20,000 cycles of continuous operation for FR-  
16 TENG.

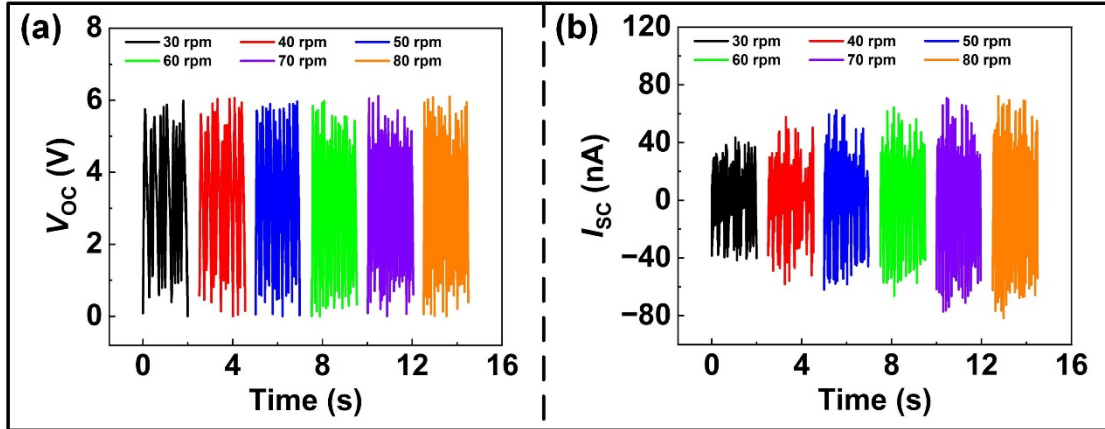

17

18 **Fig. S3** Output performance of FR-TENG at different rotational speeds. Waveforms of (a)  $V_{OC}$  and  
 19 (b) short-circuit current ( $I_{SC}$ ).

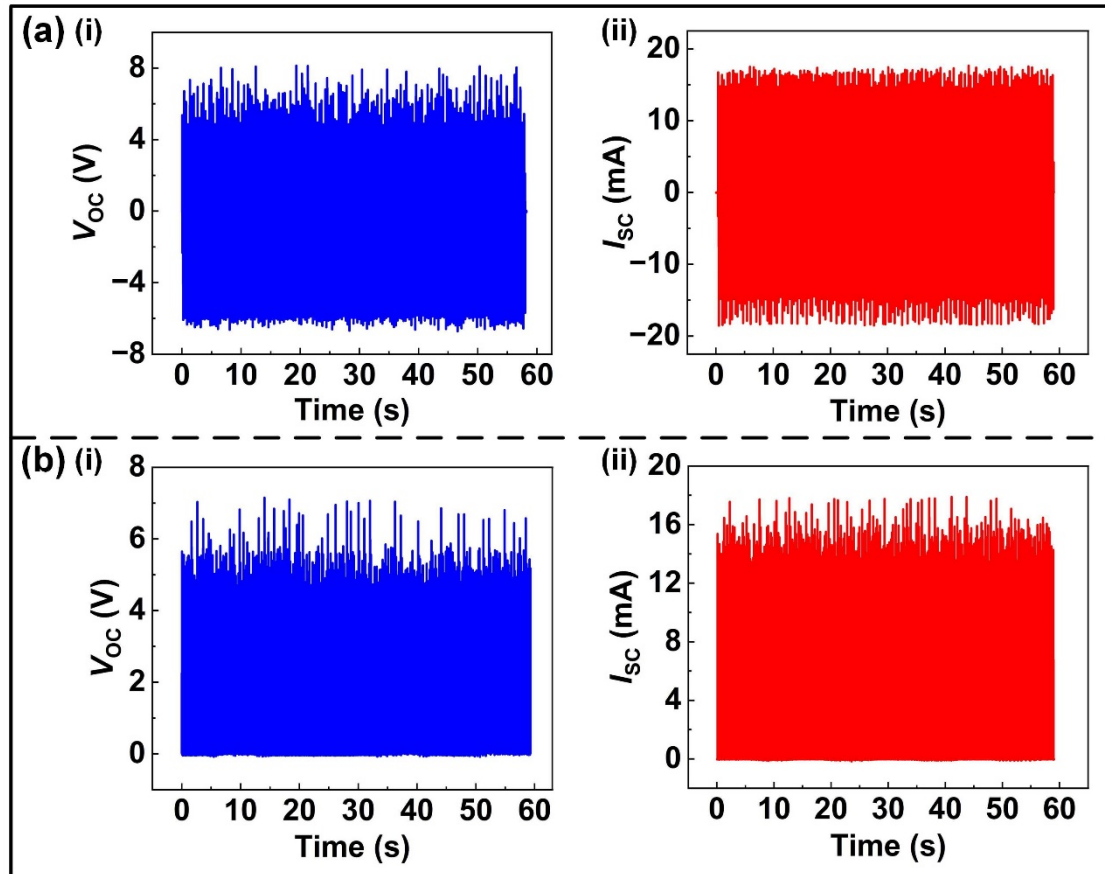

20

21 **Fig. S4** Changes in the output waveforms of L-EMG before and after rectification. Waveforms of  
 22  $V_{OC}$  and  $I_{SC}$  (a) before rectification and (b) after rectification.

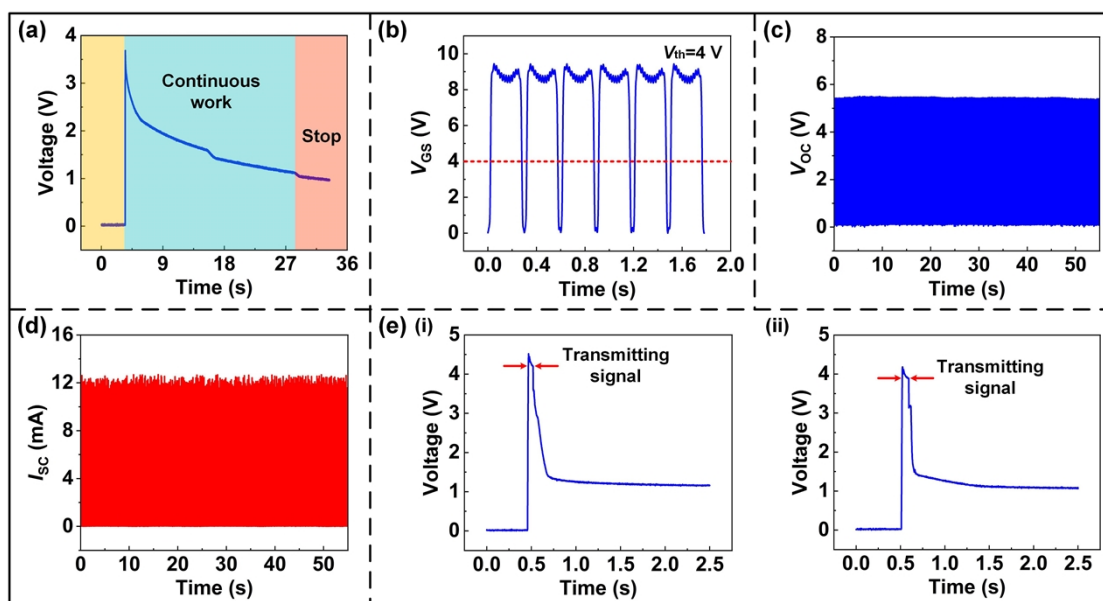

23

24 **Fig. S5** Operating curves of electronic devices and waveforms of power management circuit (PMC).  
 25 (a) The operating curve of the temperature and humidity sensor. (b) The waveform of the gate-  
 26 source voltage ( $V_{GS}$ ) of the MOSFET switch. Waveforms of (c) voltage and (d) current of the PMC  
 27 output. (e) Operating curves of the wireless transmitter module (i) wireless switch and (ii) wireless  
 28 doorbell.

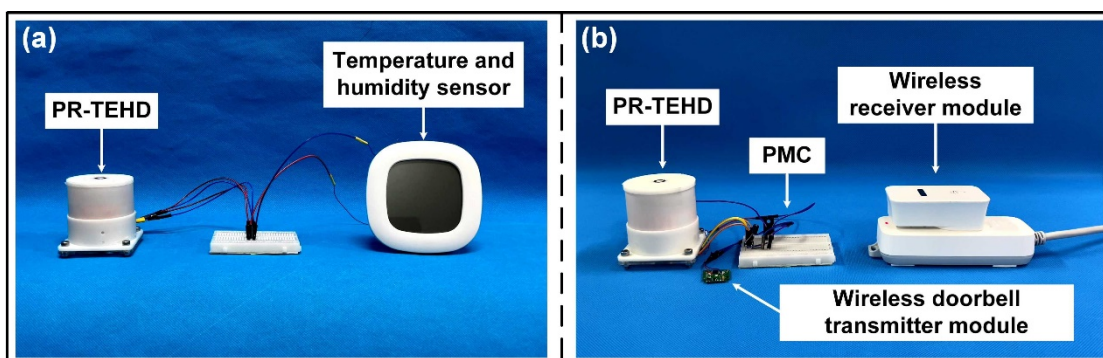

29

30 **Fig. S6** Application demonstration of PR-TEHD as a power supply. (a) Temperature and humidity  
 31 sensor and (b) wireless doorbell transmitter module are driven by PR-TEHD.

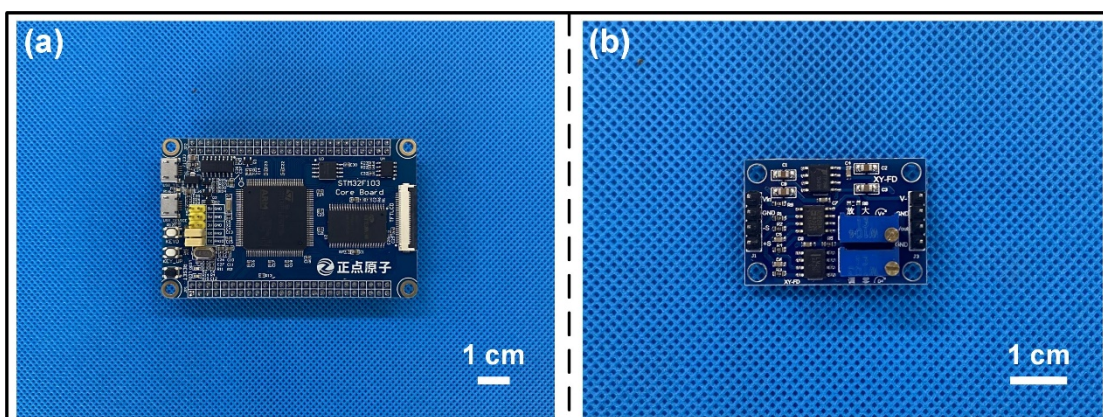

32

33 **Fig. S7** Photographs of the electronic components in the smart home control system. (a) MCU. (b)  
 34 Signal conditioning circuit module.

35 **Table S1.** The number of pulses corresponds to the MCU signal and the household appliance control  
36 state.

| Number<br>of pulses | MCU signals |       | Application 1    | Application 2 |     |
|---------------------|-------------|-------|------------------|---------------|-----|
|                     | LED 0       | LED 1 | Light brightness | Light         | Fan |
| 1                   | 0           | 0     | 0%               | ON            | OFF |
| 2                   | 1           | 0     | 30%              | OFF           | OFF |
| 3                   | 0           | 1     | 60%              | OFF           | ON  |
| 4                   | 1           | 1     | 100%             | OFF           | OFF |

37
