# Supplementary figures and images for: A press-rotary triboelectric-electromagnetic hybrid energy harvesting device for indoor IoT node power supply and smart home control
Source: Royal Society of Chemistry journal article supplement (doi:10.1039/d3se00690e), 2023-01-01

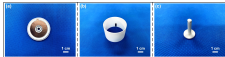

Supplement: d3se00690e2.pdf [file d3se00690e2.pdf]

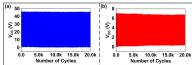

Supplement: d3se00690e3.pdf [file d3se00690e3.pdf]

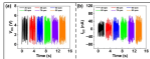

Supplement: d3se00690e4.pdf [file d3se00690e4.pdf]

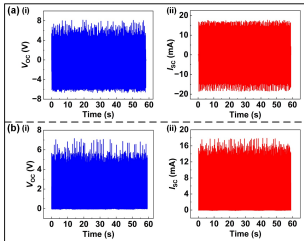

Supplement: d3se00690e5.pdf [file d3se00690e5.pdf]

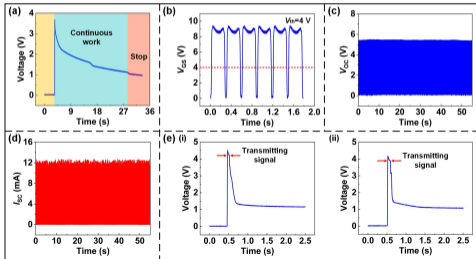

Supplement: d3se00690e6.pdf [file d3se00690e6.pdf]

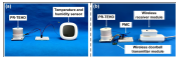

Supplement: d3se00690e7.pdf [file d3se00690e7.pdf]

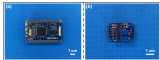

Supplement: d3se00690e8.pdf [file d3se00690e8.pdf]
